# Supplementary material for: Ginsenoside compound K alleviates d-galactose-induced mild cognitive impairment by modulating gut microbiota-mediated short-chain fatty acid metabolism
Source: Royal Society of Chemistry journal article supplement (doi:10.1039/d4fo03216k), 2024-01-01

**Table S1.** Target gene primer sequences used in the qRT-PCR experiments.

| target        | gene primer | sequence (5'–3')        |
|---------------|-------------|-------------------------|
| ZO-1          | forward     | ACCACCAACCCGAGAAGAC     |
|               | reverse     | CAGGAGTCATGGACGCACA     |
| Occludin      | forward     | TTGAAAGTCCACCTCCTTACAGA |
|               | reverse     | CCGGATAAAAAGAGTACGCTGG  |
| IL-6          | forward     | TAGTCCTTCCTACCCCAATTTC  |
|               | reverse     | TTGGTCCTTAGCCACTCCTTC   |
| IL-1 $\beta$  | forward     | GCAACTGTTCTGAACTCAACT   |
|               | reverse     | ATCTTTTGGGGTCCGTCAACT   |
| TNF- $\alpha$ | forward     | GTCTACTGAACTTCGGGGTGAT  |
|               | reverse     | GGCTACAGGCTTGTCACTCG    |
| TLR4          | forward     | AACTTCAGTGGCTGGATT      |
|               | reverse     | ACTAGGTTCGTCAGATTGG     |
| GAPDH         | forward     | AGGTCGGTGTGAACGGATTTG   |
|               | reverse     | TGTAGACCATGTAGTTGAGGTCA |

**Figure S1** CK alleviates systemic and gut inflammation in MCI mice. (A) Quantitative results of fluorescence intensity of ZO-1 ( $n = 3$ ). \*\*\* $P < 0.001$  versus the model group.

**Figure S2** The effect of gut microbiota on the MCI in CK treatment. (A) Quantification results of surviving neurons in Nissl-stained tissue ( $n = 3$ ). \*\*\* $P < 0.001$  versus the CK group. n.s.: Not significant.

**Figure S3** CK ameliorates MCI by inhibiting TLR4/MyD88/NF- $\kappa$ B signal pathway. (A)-(B) RT-qPCR results of TLR4 expression in hippocampus and colon ( $n = 6$ ). \*\*\* $P < 0.001$  versus the model group.

Figure S1

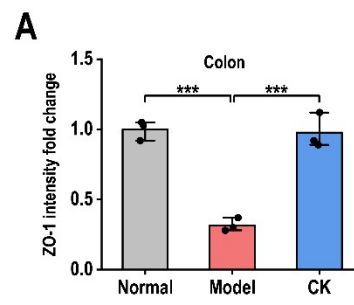

Figure S2

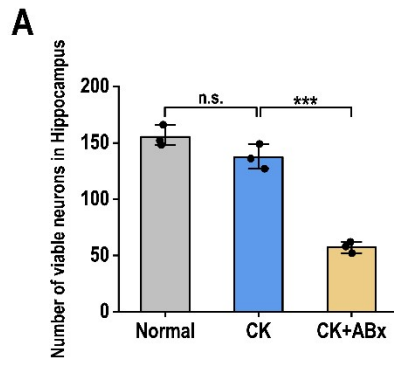

Figure S3

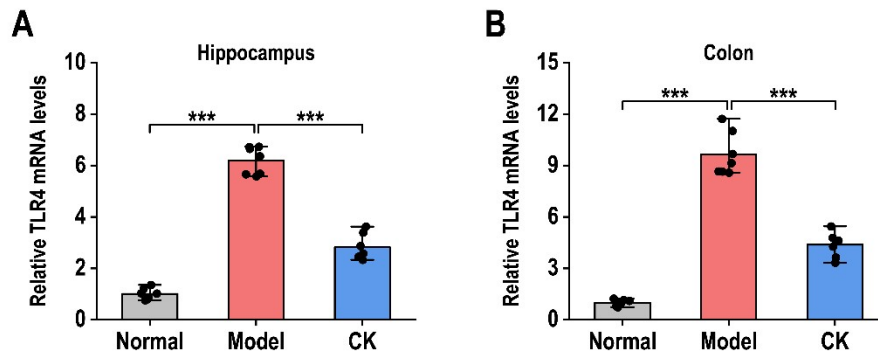

Supplement: d4fo03216k1.pdf [file d4fo03216k1.pdf]
